# Supplementary material
Source: PubMed Central journal article supplement (PMC11072885)
Supplement: 18_2020_3517_MOESM4_ESM.pdf [file 18_2020_3517_MOESM4_ESM.pdf]

**Supplementary table 1.**

**Summary of melanoma patients, MAF and DF cultures, and their involvement in individual experiments**

| Patient ID | Gender | Age | Diagnosis, clinical grading | Therapy                   | Isolated fibroblasts | Melanoma / origin of fibroblasts | Fig.1 | Fig.2a | Fig.2b | Fig.2c | Fig.2d | Fig.3a | Fig.3b | Fig.3c | Fig.3d | Fig.4 | Fig.5 | Fig.6 a-d | Fig.6e | Fig.7 |
|------------|--------|-----|-----------------------------|---------------------------|----------------------|----------------------------------|-------|--------|--------|--------|--------|--------|--------|--------|--------|-------|-------|-----------|--------|-------|
| 5          | female | 79  | pT3N2cM0 SSM‡               | CDDP§, vemurafenib, DTIC† | DF, MAF              | metastatic, cutaneous            | x     | x      | x      |        | x      | x      | x      |        |        | x     | x     |           |        |       |
| 15         | male   | 71  | MM                          | Interferon alpha-2b       | DF, MAF              | metastatic, cutaneous            | x     | x      | x      | x      | x      | x      | x      | x      | x      | x     | x     | x         | x      | x     |
| 19         | male   | 57  | pT2a SSM                    | 0                         | DF, MAF              | primary, cutaneous               | x     | x      | x      | x      | x      | x      | x      | x      |        | x     | x     | x         | x      | x     |
| 22         | male   | 74  | pT4b MM                     | 0                         | DF, MAF              | primary, cutaneous               | x     | x      | x      | x      | x      | x      | x      | x      | x      | x     | x     | x         | x      | x     |
| 23         | male   | 69  | pT4b MM                     | 0                         | DF, MAF              | primary, cutaneous               | x     | x      | x      | x      |        | x      | x      | x      | x      |       | x     | x         | x      |       |
| 35         | male   | 76  | pT3b MM                     | 0                         | DF, MAF              | metastatic, cutaneous            | x     | x      | x      |        | x      | x      | x      | x      | x      | x     | x     | x         | x      |       |
| 41         | male   | 43  | MM                          | Interferon alpha-2b       | DF, MAF              | metastatic, cutaneous            | x     |        |        | x      |        | x      | x      |        |        | x     |       |           | x      | x     |
| 48         | male   | 71  | pT3b SSM                    | 0                         | DF, MAF              | primary, cutaneous               | x     |        |        | x      |        | x      | x      |        |        |       |       |           | x      |       |
| 55         | male   | 58  | pT4b non-classifiable MM    | 0                         | DF, MAF              | primary, cutaneous               | x     |        |        | x      |        | x      | x      |        |        |       |       |           | x      |       |

† DTIC: dacarbazine; § CDDP: cisplatin; ‡ SSM: superficial spreading melanoma

Melanoma-associated fibroblasts impair CD8+ T cell function and modify expression of immune checkpoint regulators via increased arginase activity

Barbara Érsek<sup>1,2\*</sup>, Pálma Silló<sup>3\*</sup>, Ugur Cakir<sup>3</sup>, Viktor Molnár<sup>4</sup>, András Bencsik<sup>1</sup>, Balázs Mayer<sup>3</sup>, Eva Mezey<sup>5</sup>, Sarolta Kárpáti<sup>3</sup>, Zoltán Pósi<sup>§</sup> and Krisztián Németh<sup>3§</sup>

Corresponding author:

Zoltán Pósi

Department of Genetics, Cell and Immunobiology, Semmelweis University

4 Nagyvarad ter, VII/709, Budapest, H-1089, Hungary

Phone: +36-1-210-2930 Ext. 56435

Fax: +36-1-303-6968

E-mail: [pos.zoltan@med.semmelweis-univ.hu](mailto:pos.zoltan@med.semmelweis-univ.hu)
