# Supplementary material
Source: PubMed Central journal article supplement (PMC11072885)
Supplement: 18_2020_3517_MOESM5_ESM.pdf [file 18_2020_3517_MOESM5_ESM.pdf]

**Supplementary table 2.****Summary of healthy blood donors and their involvement in individual experiments**

| <b>Donor ID</b> | <b>Gender</b> | <b>Age</b> | <b>Fig.2a</b> | <b>Fig.2b</b> | <b>Fig.2c</b> | <b>Fig.2d</b> | <b>Fig.3a</b> | <b>Fig.3b</b> | <b>Fig.3c</b> | <b>Fig.3d</b> | <b>Fig.4</b> | <b>Fig.7</b> |
|-----------------|---------------|------------|---------------|---------------|---------------|---------------|---------------|---------------|---------------|---------------|--------------|--------------|
| 1               | female        | 36         | x             | x             |               |               | x             | x             | x             |               |              |              |
| 2               | female        | 36         |               | x             |               |               | x             | x             | x             | x             |              | x            |
| 3               | female        | 26         |               |               | x             |               |               |               |               |               |              |              |
| 4               | female        | 30         |               |               |               |               | x             | x             |               |               |              |              |
| 5               | female        | 42         |               |               | x             |               |               |               |               |               |              |              |
| 6               | female        | 27         | x             |               |               |               |               |               |               |               |              |              |
| 7               | female        | 44         |               |               |               |               |               |               |               |               | x            | x            |
| 8               | female        | 48         | x             |               |               |               |               |               |               |               | x            |              |
| 9               | female        | 26         |               |               |               |               |               |               |               |               | x            |              |
| 10              | female        | 28         |               |               |               |               |               |               |               |               |              | x            |
| 11              | female        | 33         |               |               |               |               |               |               |               |               | x            |              |
| 12              | female        | 32         |               |               |               |               |               |               |               |               |              | x            |
| 13              | female        | 38         |               |               |               |               |               |               |               |               | x            |              |
| 14              | female        | 32         |               |               |               |               |               |               |               |               |              | x            |
| 15              | female        | 39         |               |               | x             |               | x             | x             |               |               |              |              |
| 16              | female        | 32         |               |               |               |               | x             | x             |               |               |              |              |
| 17              | female        | 46         |               |               |               |               | x             | x             |               |               | x            |              |
| 18              | female        | 21         |               |               | x             |               |               |               |               |               |              |              |

|    |        |    |   |   |   |  |   |   |   |   |  |   |
|----|--------|----|---|---|---|--|---|---|---|---|--|---|
| 19 | female | 45 |   |   | x |  |   |   |   |   |  |   |
| 20 | male   | 30 |   | x |   |  | x | x | x | x |  |   |
| 21 | male   | 42 | x | x | x |  | x | x | x | x |  |   |
| 22 | male   | 37 |   | x | x |  | x | x | x | x |  | x |
| 23 | male   | 27 | x | x |   |  |   |   |   |   |  | x |
| 24 | male   | 28 | x |   |   |  |   |   |   |   |  | x |

**Melanoma-associated fibroblasts impair CD8+ T cell function and modify expression of immune checkpoint regulators via increased arginase activity**

Barbara Érsek<sup>1,2\*</sup>, Pálma Silló<sup>3\*</sup>, Ugur Cakir<sup>3</sup>, Viktor Molnár<sup>4</sup>, András Bencsik<sup>1</sup>, Balázs Mayer<sup>3</sup>, Eva Mezey<sup>5</sup>, Sarolta Kárpáti<sup>3</sup>, Zoltán Pósi<sup>1§</sup> and Krisztián Németh<sup>3§</sup>

Corresponding author:

Zoltán Pósi

Department of Genetics, Cell and Immunobiology, Semmelweis University

4 Nagyvarad ter, VII/709, Budapest, H-1089, Hungary

Phone: +36-1-210-2930 Ext. 56435; Fax: +36-1-303-6968

E-mail: pos.zoltan@med.semmelweis-univ.hu
