# Supplementary material
Source: PubMed Central journal article supplement (PMC11072885)
Supplement: 18_2020_3517_MOESM6_ESM.pdf [file 18_2020_3517_MOESM6_ESM.pdf]

**Supplementary table 3.**  
**Summary of the antibodies, ELISA and ELISPOT assays used**

| Target antigen                                              | Labeling              | Clone     | Cat. No.                        |
|-------------------------------------------------------------|-----------------------|-----------|---------------------------------|
| $\alpha$ -SMA                                               | FITC                  | 1A4       | Abcam ab8211                    |
| FAP                                                         | AF488                 | 427819    | R&D systems,<br>FAB3715G        |
| MelanA                                                      | none                  | EP1422Y   | Abcam, ab51061;                 |
| gp100                                                       | none                  | EP4863(2) | Abcam, ab137078;                |
| CD69                                                        | FITC                  | FN50      | BD Biosciences,<br>555530       |
| granzyme B                                                  | PE                    | GB11      | BD Biosciences,<br>561142       |
| CD45RO                                                      | PerCP-eFluor710/AF488 | UCHL1     | eBioscience,<br>46-0457-41      |
| PS                                                          | CF488A                | annexin V | Biotium, 29005                  |
| TIGIT                                                       | PE-Cy7                | MBSA43    | eBioscience,<br>25-9500-41      |
| BTLA                                                        | PE-Cy7                | MIH26     | Sony, 2322575                   |
| VISTA                                                       | PE                    | 730804    | R&D systems,<br>FAB712661P      |
| PD-1                                                        | PE                    | MIH4      | eBioscience,<br>12-9969-41      |
| TIM-3                                                       | PE-Vio770             | REA635    | Miltenyi Biotec,<br>130-109-759 |
| CD8 $\beta$                                                 | APC                   | 2ST8.5H7  | BD Biosciences,<br>641058       |
| HVEM                                                        | PE                    | 122       | Biolegend, 318805               |
| CD155                                                       | PE                    | PV404.19  | Miltenyi Biotec,<br>130-105-905 |
| PD-L1                                                       | PE                    | 29E.2A3   | Biolegend, 329705               |
| Galectin-3                                                  | PE                    | M3/38     | Miltenyi Biotec,<br>130-101-314 |
| Galectin-9                                                  | PE                    | 9M1-3     | Biolegend, 348905               |
| anti-rabbit IgG                                             | PE                    | Poly4064  | Biolegend, 406421               |
| TGF beta-1 Human<br>ELISA Kit                               | -                     | -         | Thermo Fisher<br>BMS249-4       |
| Human IL-6 ELISA<br>MAX Deluxe                              | -                     | -         | BioLegend 430504                |
| Prostaglandin E2<br>Parameter Assay Kit                     | -                     | -         | R&D Systems,<br>KGE004B         |
| L-Kynurenine<br>ELISA kit                                   | -                     | -         | Immusmol BA-E-<br>2200          |
| MMP9 Human<br>ELISA Kit                                     | -                     | -         | Thermo Fisher<br>BMS2016-2      |
| Human<br>CXCL12/SDF-1<br>alpha Quantikine<br>ELISA Kit      | -                     | -         | R&D Systems,<br>DSA00           |
| Human IFN-<br>gamma/Granzyme B<br>Dual-Color ELISpot<br>Kit | -                     | -         | R&D Systems,<br>ELD5818         |

Melanoma-associated fibroblasts impair CD8<sup>+</sup> T cell function and modify expression of immune checkpoint regulators via increased arginase activity

Barbara Érsek<sup>1,2\*</sup>, Pálma Silló<sup>3\*</sup>, Ugur Cakir<sup>3</sup>, Viktor Molnár<sup>4</sup>, András Bencsik<sup>1</sup>, Balázs Mayer<sup>3</sup>, Eva Mezey<sup>5</sup>, Sarolta Kárpáti<sup>3</sup>, Zoltán Pósi<sup>1§</sup> and Krisztián Németh<sup>3§</sup>

Corresponding author:

Zoltán Pósi

Department of Genetics, Cell and Immunobiology, Semmelweis University

4 Nagyvarad ter, VII/709, Budapest, H-1089, Hungary

Phone: +36-1-210-2930 Ext. 56435

Fax: +36-1-303-6968

E-mail: [pos.zoltan@med.semmelweis-univ.hu](mailto:pos.zoltan@med.semmelweis-univ.hu)
